# Supplementary material for: Within-Host Evolution of Burkholderia pseudomallei during Chronic Infection of Seven Australasian Cystic Fibrosis Patients
Source: PubMed Central journal article supplement (PMC5388805; doi:10.1128/mbio.00356-17), 2017-04-11

**A**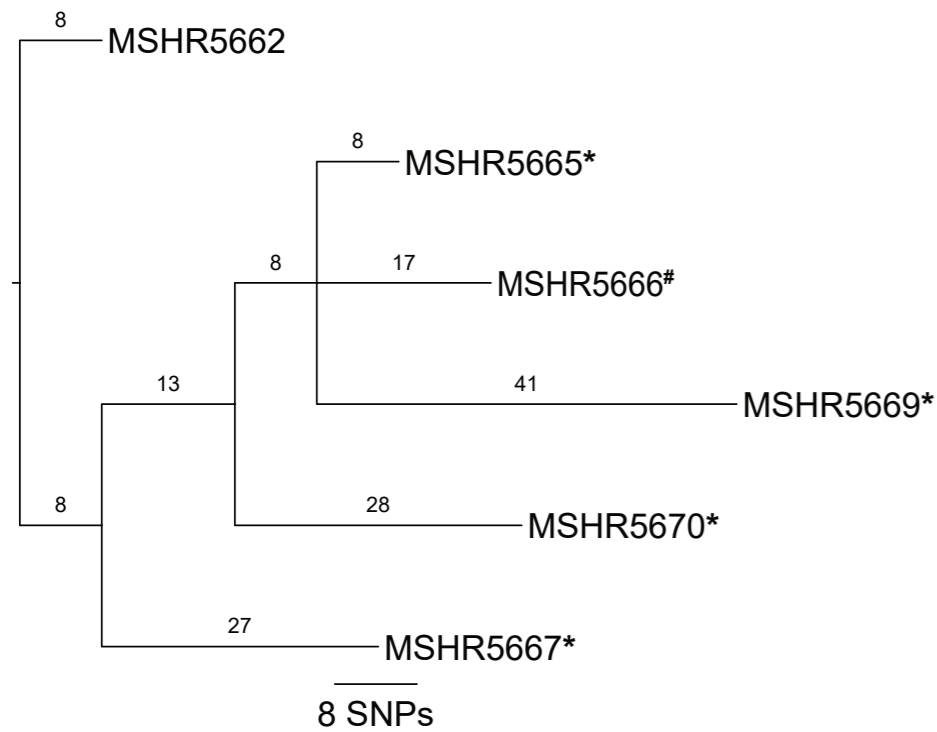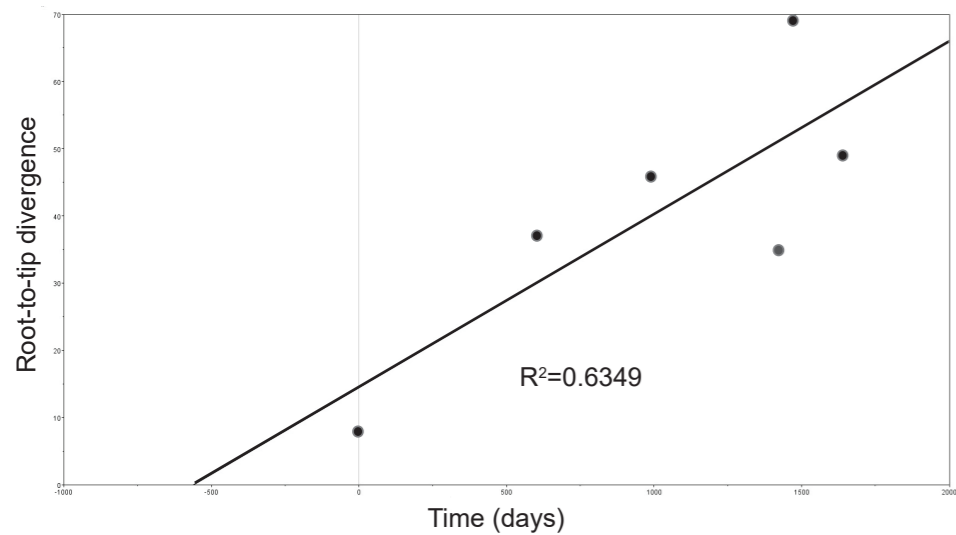**B**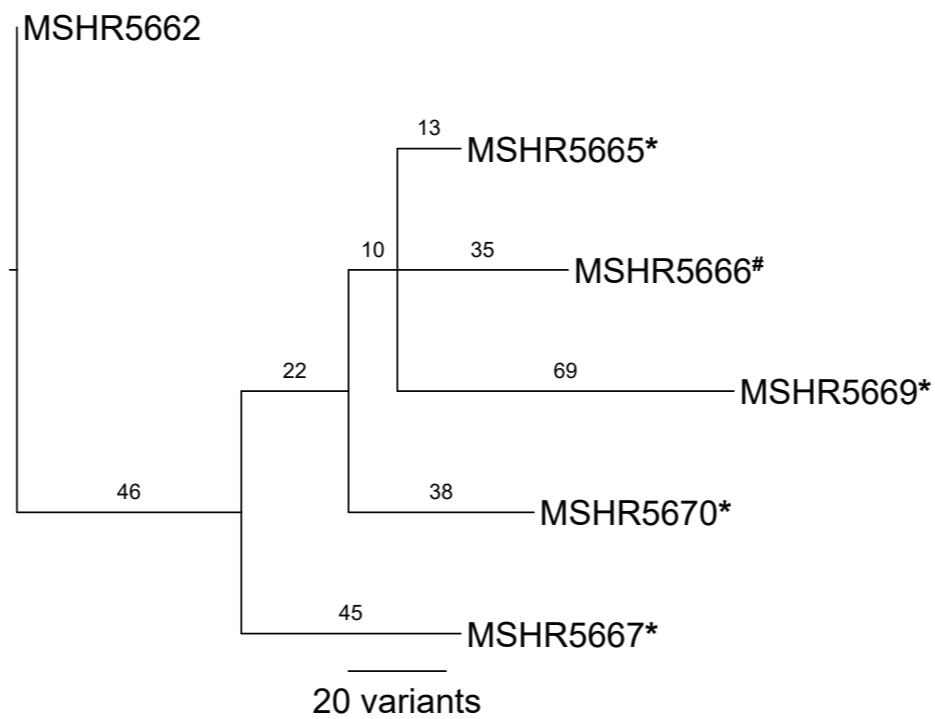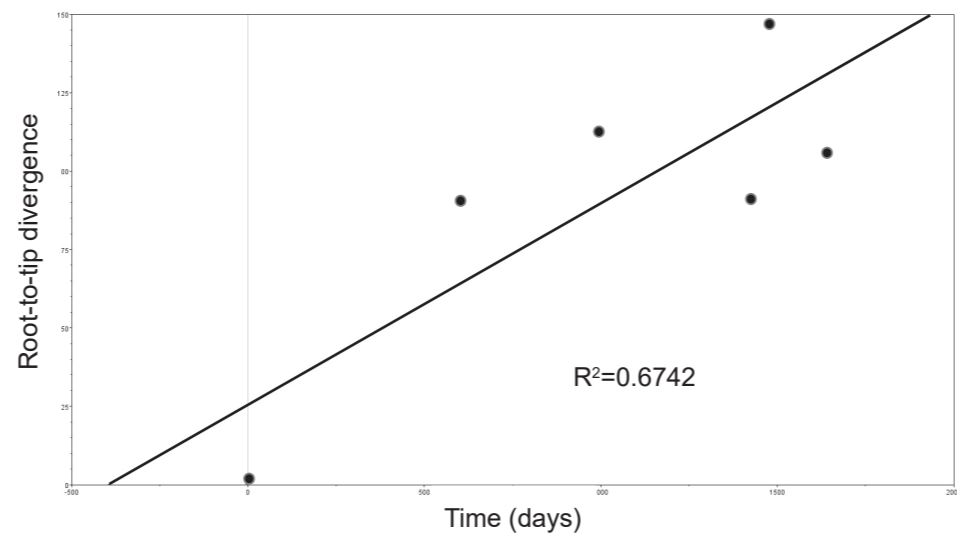**C**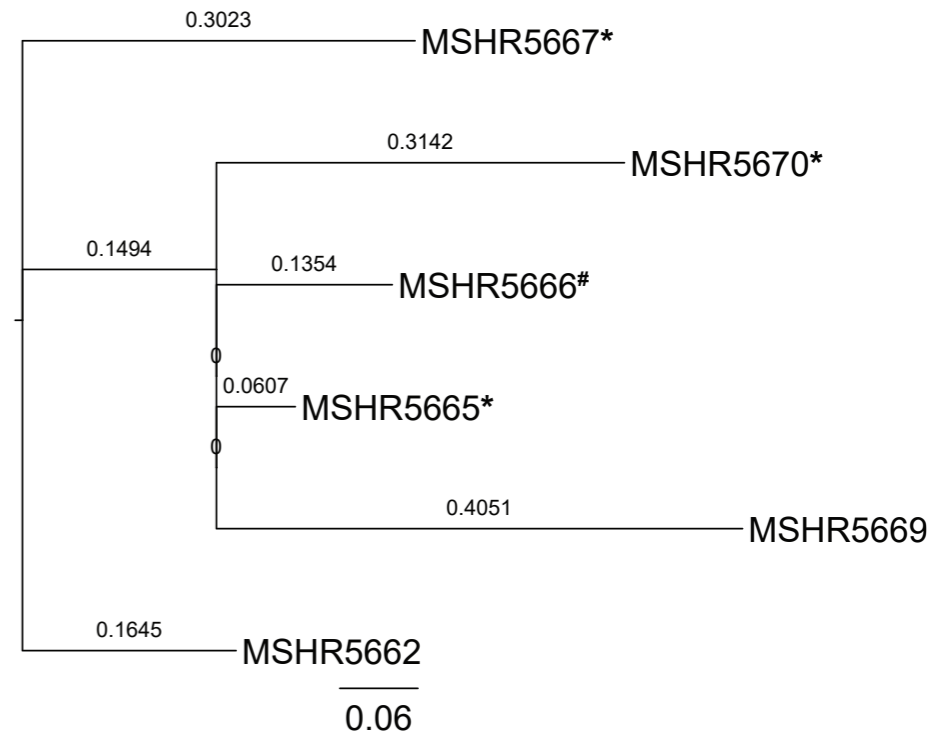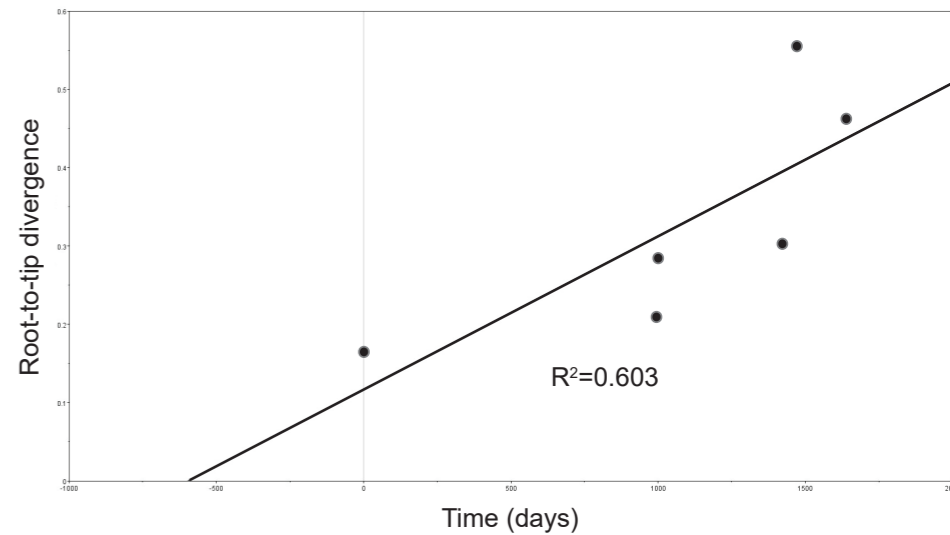

Supplement: mbo002173266sf2.pdf [file mbo002173266sf2.pdf]
